# Supplementary material for: The Responses of Sediment Bacterial Communities in Chinese Mitten Crab (Eriocheir sinensis) Culture Ponds to Changes in Physicochemical Properties Caused by Sediment Improvement
Source: MDPI journal article supplement (doi:10.3390/fishes8020098), 2023-02-07
Supplement: s1 [file s1]

Archive with 1 entries (1 files):
- fishes-2174968-supplementary.pdf
