# Supplementary material for: The Responses of Sediment Bacterial Communities in Chinese Mitten Crab (Eriocheir sinensis) Culture Ponds to Changes in Physicochemical Properties Caused by Sediment Improvement
Source: MDPI journal article supplement (doi:10.3390/fishes8020098), 2023-02-07
Supplement: s1 [file s1 › fishes-2174968-supplementary.pdf]

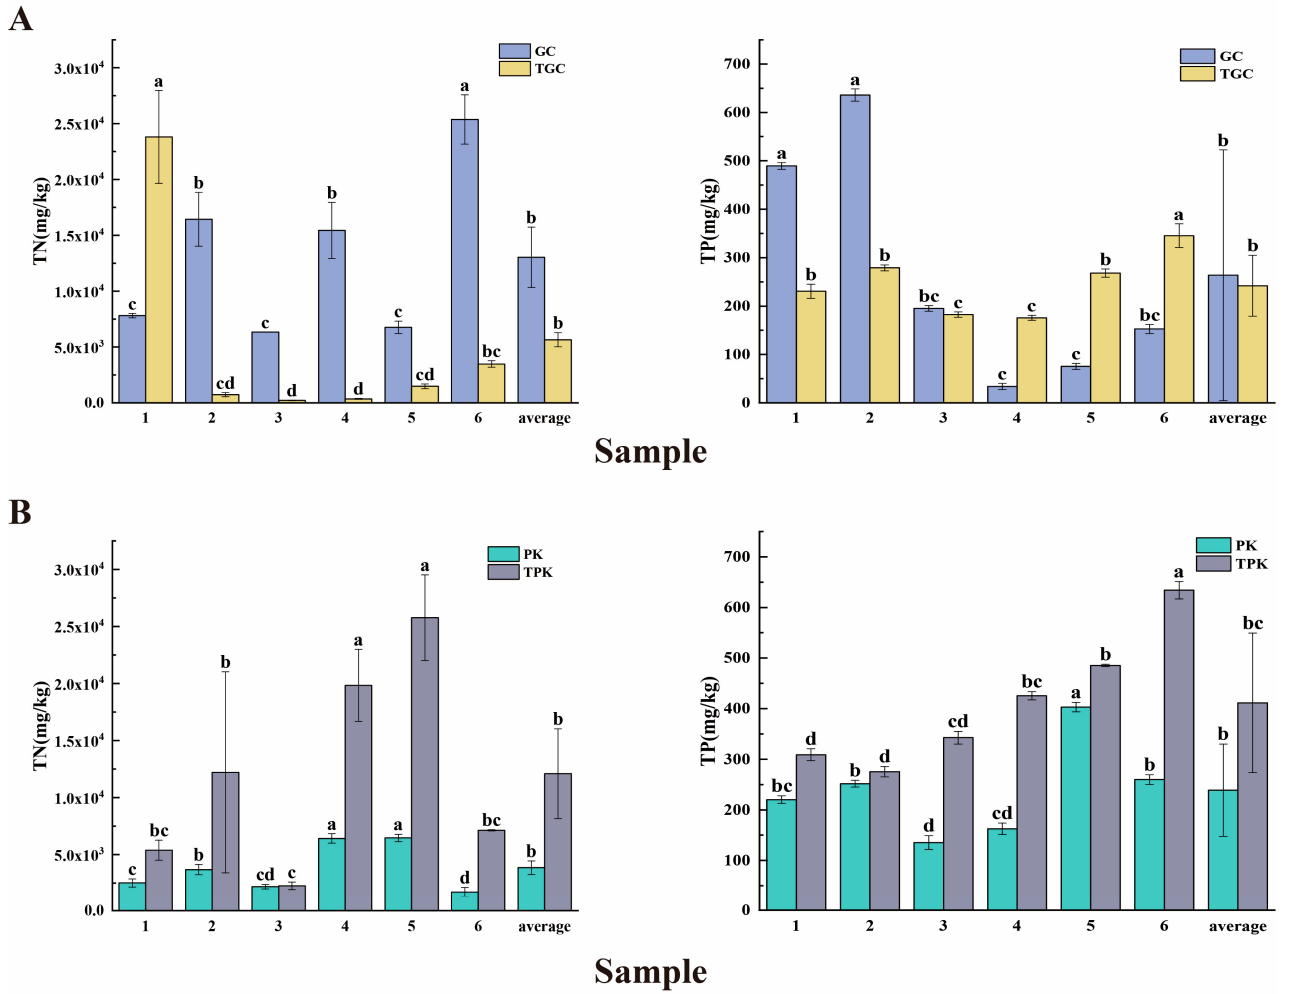

**Figure S1.** Concentrations of TN and TP in the sediments. (A) TN and TP concentration of GC and TGC: GC: samples of the Gaochun District before sediment improvement; TGC: samples of the Gaochun District after sediment improvement; (B) TN and TP concentration of PK and TPK: PK: samples of the Pukou District before sediment improvement; TPK: samples of the Pukou District after sediment improvement; average: the average of GC, TGC PK and TPK. Values were given as mean  $\pm$  SD, and different letters in the upper (a, b, c, d) indicate a significant difference ( $p < 0.05$ ) before and after sediment improvement based on the analysis of variance.

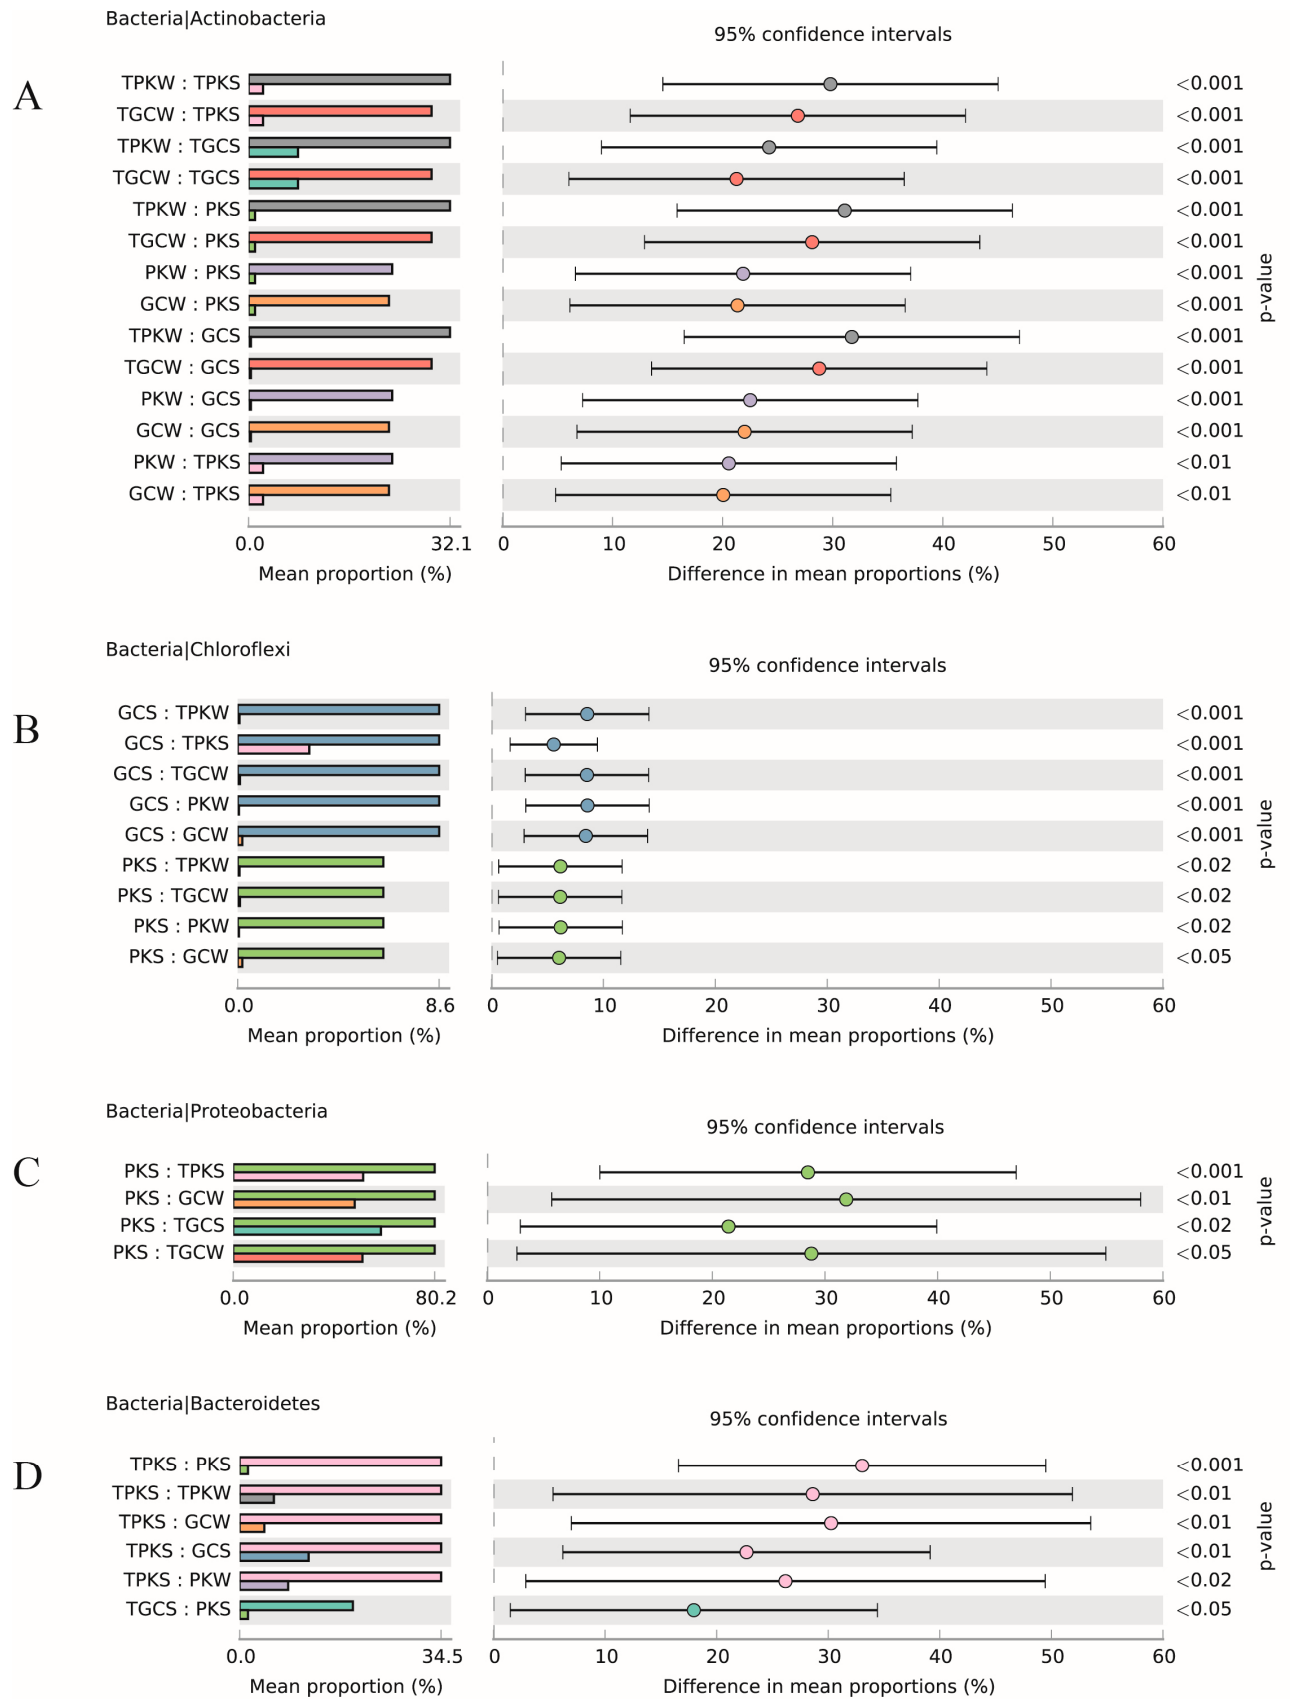

**Figure S2.** Intergroup comparison of dominant phylum. (A)Actinobacteria; (B)Chloroflexi; (C)Proteobacteria; (D)Bacteroidetes.

A

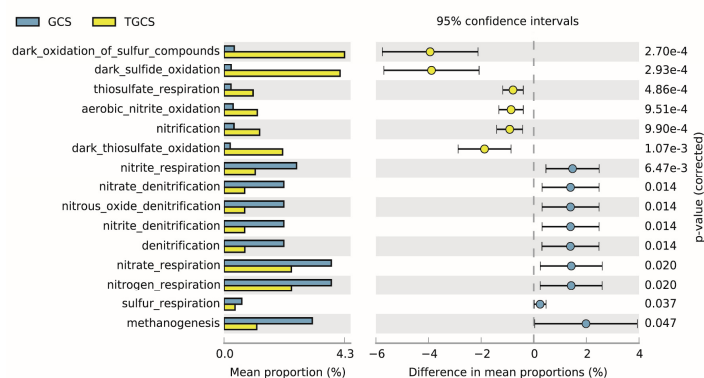

B

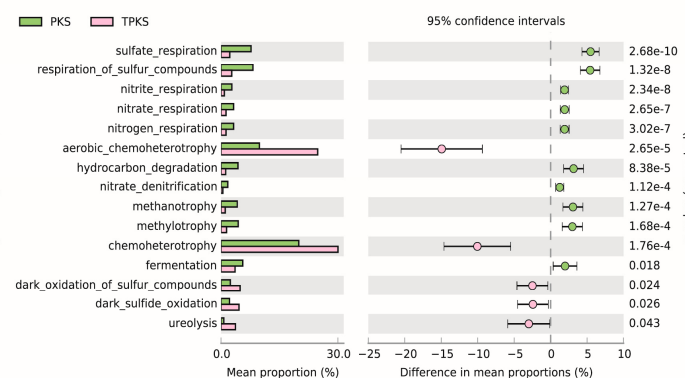

C

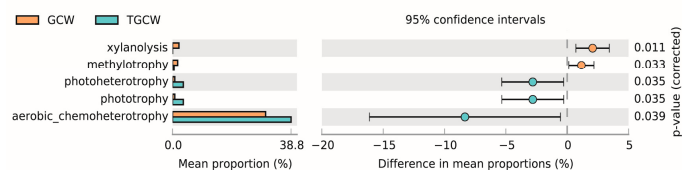

D

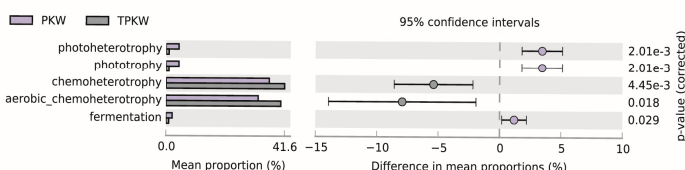

**Figure S3.** Comparison of functional abundances of different groups involved in C, N and S metabolism. (A)GCS and TGCS; (B)PKS and TPKS; (C)GCW and TGCW; (D)PKW and TPKW.
